# Supplementary material
Source: PubMed Central journal article supplement (PMC3128716)
Supplement: 11103_2010_9654_MOESM2_ESM.pdf [file 11103_2010_9654_MOESM2_ESM.pdf]

**Supplemental Figure 1 online:** Climate regime of growing season and sampling conditions of greenhouse-grown Grey poplars

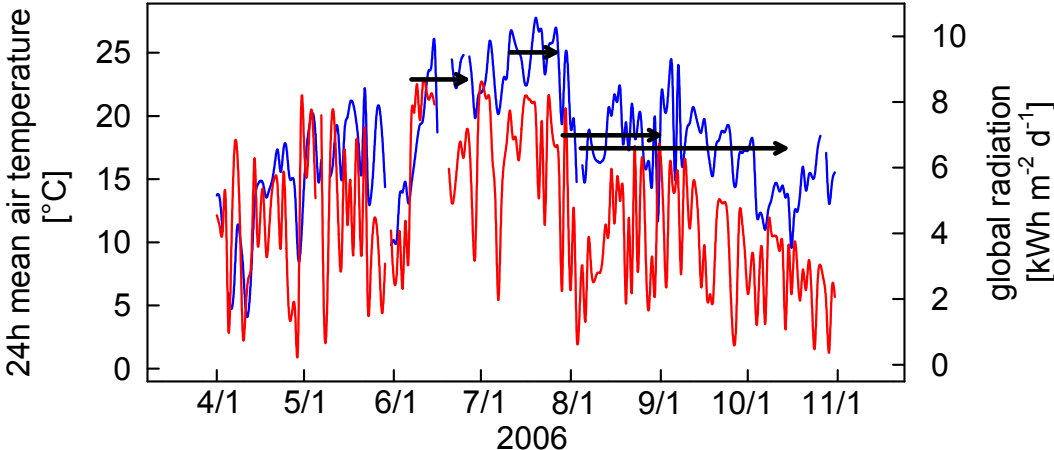

**Figure S1** Climate regime of growing season (1<sup>st</sup> of April to 31<sup>st</sup> of October) and sampling conditions of greenhouse-grown Grey poplars. 24h mean of inside temperature in °C is indicated by the blue line and daily sum of outside global radiation in kWh m<sup>-2</sup> d<sup>-1</sup> by the red line. The arrows present the lifetime of harvested leaves (mean of all) where the end is the sampling date (06/28, 07/26, 09/05 and 10/14). Vertical position is according to the mean temperature experienced within the life time.
