# Supplementary material
Source: PubMed Central journal article supplement (PMC3128716)
Supplement: 11103_2010_9654_MOESM3_ESM.pdf [file 11103_2010_9654_MOESM3_ESM.pdf]

**Supplemental Figure 2 online:** Relative transcript levels of isoprenoid pathway enzymes (*PcDXS*, *PcDXR*, *PcISPS*, *PcPSY*) and enzyme activity and relative transcript level of phosphoenolpyruvate carboxylase (*PcPEPC*).

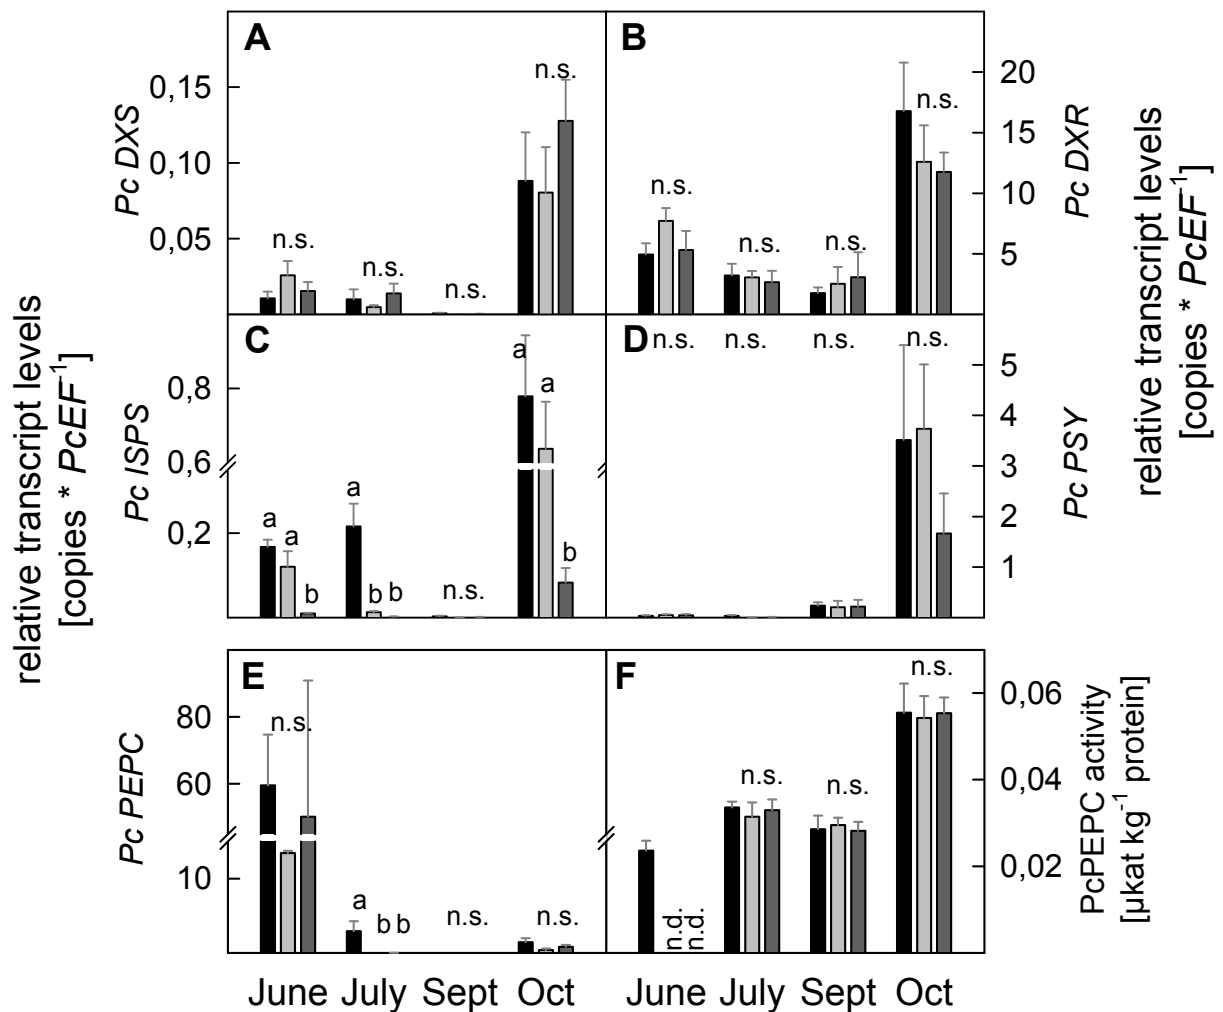

**Figure S2** Relative transcript levels of isoprenoid pathway enzymes (*PcDXS*, (A); *PcDXR*, (B); *PcISPS*, (C); *PcPSY*, (D)) as well as relative transcript level and enzyme activity of phosphoenolpyruvate carboxylase (*PcPEPC*/*PcPEPC*, E and F), of *P. x canescens* plants grown one season in a greenhouse. Analyzed were wild type plants (WT, ■, n=6), empty vector control (C, □, n=3-6 +SE), *PcISPS*-RNAi lines (Ra1/2/17/18/22, ▒, n=7-11). Transcript levels were normalized to elongation factor 1β (*PcEF*). ANOVA was performed for each sampling date separately (SPSS, P>0.05), error bars represent the standard error of mean. n.s. not significant. n.d. not determined.
