# Supplementary material
Source: PubMed Central journal article supplement (PMC3128716)
Supplement: 11103_2010_9654_MOESM4_ESM.pdf [file 11103_2010_9654_MOESM4_ESM.pdf]

**Supplemental Figure 3 online:** Amino acid concentrations of *P. x canescens* plants cultivated for one growing season in the greenhouse.

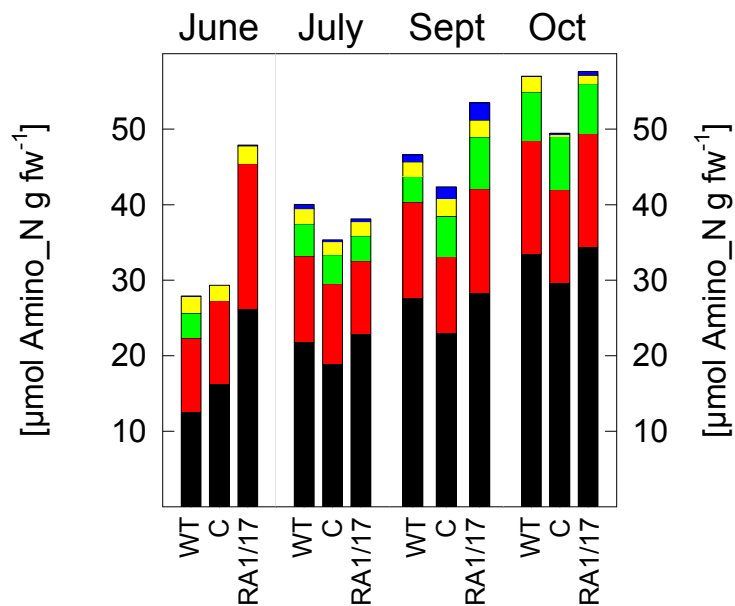

**Figure S3** Amino acid concentrations of *P. x canescens* plants cultivated for one growing season in the greenhouse. Amino acids are grouped according to their metabolic precursors:  $\alpha$ -ketoglutarate (black: Glu, Gln, Arg, His, Pro), oxaloacetate (red: Asn, Asp, Lys, Met, Thr, Ile), phosphoglycerate (green: Ser, Cys, Gly), erythrose 4-phosphate (yellow: Trp, Tyr, Phe) and pyruvate (blue: Leu, Val, Ala). Analyzed were wild type plants (WT, n=3-5), empty vector control (C, n=3-6) and *PcISPS*-RNAi lines (Ra1/17, n=4-10). ANOVA was performed for each sampling date separately (SPSS,  $P > 0.05$ ).
